# Supplementary material for: Coordination frameworks assembled from CuII ions and H2-1,3-bdpb ligands: X-ray and magneto structural investigations, and catalytic activity in the aerobic oxidation of tetralin
Source: Royal Society of Chemistry journal article supplement (doi:10.1039/c4dt01880j), 2014-01-01
Supplement: c4dt01880j1.pdf [file c4dt01880j1.pdf]

## Supporting Information

### **Coordination Frameworks assembled from Cu<sup>II</sup> ions and H<sub>2</sub>-1,3-bdpb benzene ligands: X-ray and Magneto Structural Investigations, and Catalytic Activity in the Aerobic Oxidation of Tetralin**

Maciej Grzywa,<sup>a</sup> Christof Geßner,<sup>b</sup> Björn Bredenkötter,<sup>a</sup> Dmytro Denysenko,<sup>a</sup> Jan van Leusen,<sup>c</sup> Paul Kögerler,<sup>c</sup> Elias Klemm,<sup>b</sup> and Dirk Volkmer<sup>a\*</sup>

<sup>a</sup> Chair of Solid State and Materials Chemistry, Institute of Physics, Augsburg University, Universitätsstr. 1, 86159 Augsburg, Germany.

<sup>b</sup> Institute of Chemical Technology, Faculty of Chemistry, University of Stuttgart, Pfaffenwaldring 55, 70569 Stuttgart, Germany.

<sup>c</sup> Institute of Inorganic Chemistry RWTH Aachen University, Landoltweg 1, 52074 Aachen, Germany.

---

\* Corresponding author. Fax: +49 (0)821 598-5955; Tel: +49 (0)821 598-3006; E-mail: dirk.volkmer@physik.uni-augsburg.de

### Single Crystal Structure Analysis of H<sub>2</sub>-1,3-bdpp·MeOH (C<sub>16</sub>H<sub>22</sub>N<sub>4</sub>·CH<sub>3</sub>OH).

The asymmetric unit contains ten carbon, two nitrogen and one oxygen atoms, accounting for one half of H<sub>2</sub>-1,3-bdpp and one MeOH molecule. The complete H<sub>2</sub>-1,3-bdpp is then generated by the reflection in a mirror plane (Scheme S1). The C7, C9 atoms of the phenyl ring and C10, O1 atoms of MeOH are placed on a crystallographic mirror plane (2e in Wyckoff notation). While the phenyl ring of the molecule is almost parallel to the (100) plane, the pyrazole rings are inclined with respect to the phenyl ring. The two equatorial planes created by C1-C5, N1-N2 and C6-C9 atoms enclose an angle of 41.24(5)° (see Scheme S1). An Ortep style plot of the asymmetric unit of H<sub>2</sub>-1,3-bdpp·MeOH with the atom labels is shown in Fig. S1.

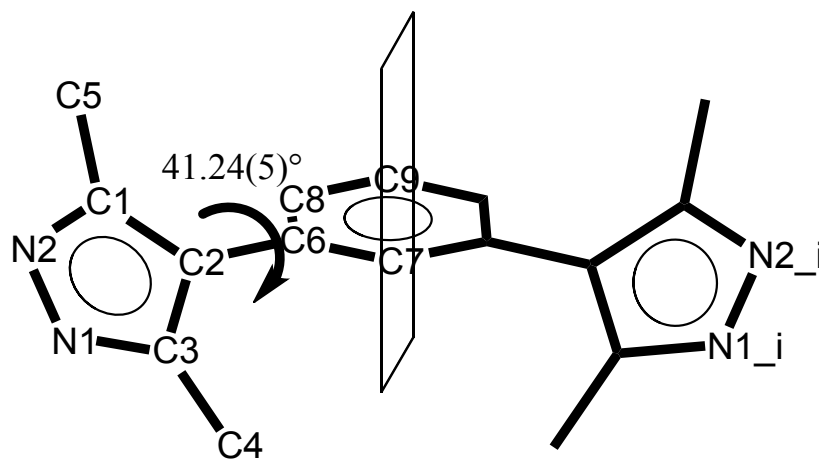

**Scheme S1** Conformation of H<sub>2</sub>-1,3-bdpp in the crystal lattice of H<sub>2</sub>-1,3-bdpp·MeOH. (H-atoms omitted for clarity. Symmetry transformation used to generate equivalent atoms: (i)  $-x, y+1/2, -z$ .)

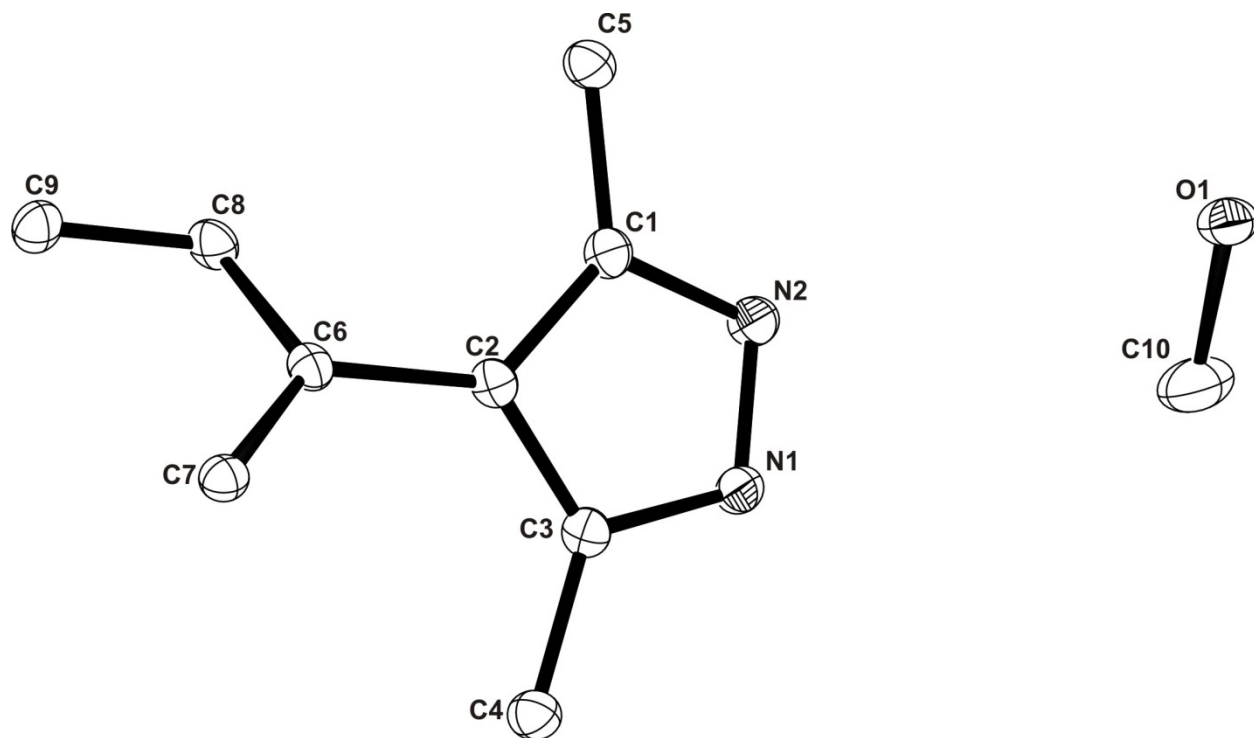

**Fig. S1.** Ortep-style plot of the asymmetric unit of  $\text{H}_2\text{-1,3-bdpb}\cdot\text{MeOH}$ . Thermal ellipsoids probability: 50 %. Hydrogen atoms are omitted for clarity.

$\text{H}_2\text{-1,3-bdpb}\cdot\text{MeOH}$  exhibits a 2D layered packing motif. The first layer is created by  $\text{H}_2\text{-1,3-bdpb}$  molecules while the second one is created by solvent molecules. The whole structure is stabilized by hydrogen bridges formed between MeOH molecules and nitrogen atoms of  $\text{H}_2\text{-1,3-bdpb}$ . The packing diagram of  $\text{H}_2\text{-1,3-bdpb}$  along the  $a$ -direction is shown in Fig. S2. The atomic coordinates and isotropic thermal parameters, selected bond lengths and angles are presented in Tables S1-S2, respectively.

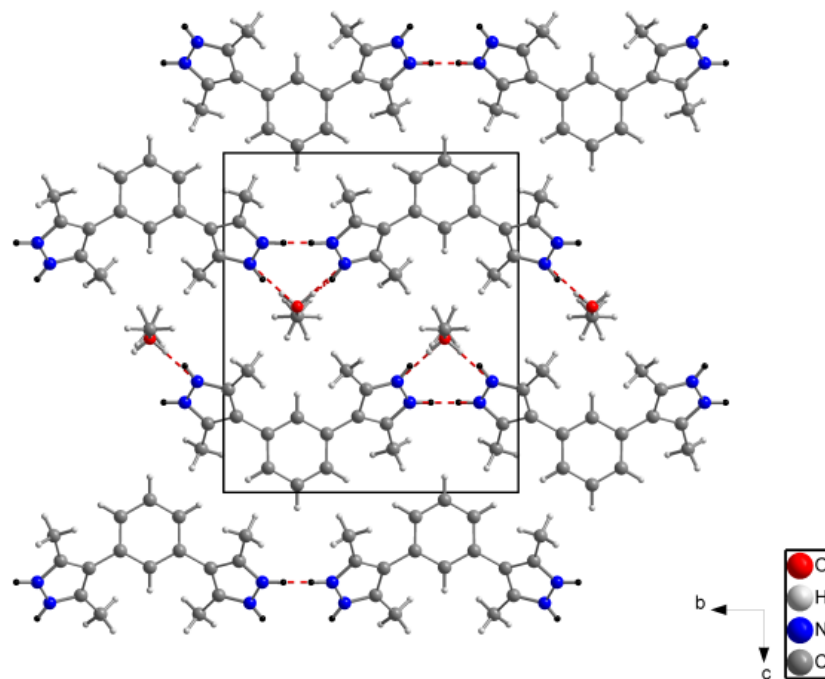

**Fig. S2** Packing diagram of H<sub>2</sub>-1,3-bdpp·MeOH with hydrogen bonds shown as intercepted red lines. Black hydrogen atoms from H<sub>2</sub>-1,3-bdpp molecules are shown with 50 % occupation. (In the crystal structure of H<sub>2</sub>-1,3-bdpp·MeOH the acidic NH-protons of H<sub>2</sub>-1,3-bdpp have been placed in calculated positions ( $d(\text{NH}) = 0.88 \text{ \AA}$ ). Owing to lattice symmetry both nitrogen atoms of each pyrazole ring appear to be protonated at 50% probability).

**Table S1.** Atomic coordinates ( $\times 10^4$ ) and equivalent isotropic displacement parameters ( $\text{\AA}^2 \times 10^3$ ) for H<sub>2</sub>-1,3-bdpp·MeOH.  $U(\text{eq})$  is defined as one third of the trace of the orthogonalized  $U^{\text{IJ}}$  tensor.

|      | x        | y       | z       | U(eq) |
|------|----------|---------|---------|-------|
| O(1) | 1107(3)  | 2500    | 5474(1) | 17(1) |
| N(1) | 9587(3)  | 4107(1) | 6738(1) | 19(1) |
| N(2) | 7797(3)  | 3685(1) | 7352(1) | 20(1) |
| C(1) | 7224(4)  | 4472(1) | 7977(1) | 16(1) |
| C(2) | 8668(4)  | 5435(1) | 7763(1) | 14(1) |
| C(3) | 10128(4) | 5160(1) | 6967(1) | 15(1) |
| C(4) | 12076(4) | 5826(1) | 6414(1) | 18(1) |
| C(5) | 5215(4)  | 4247(1) | 8720(1) | 18(1) |
| C(6) | 8710(3)  | 6495(1) | 8278(1) | 14(1) |

|       |         |         |         |       |
|-------|---------|---------|---------|-------|
| C(7)  | 8637(5) | 7500    | 7795(2) | 14(1) |
| C(8)  | 8852(4) | 6510(1) | 9282(1) | 16(1) |
| C(9)  | 8916(5) | 7500    | 9775(2) | 17(1) |
| C(10) | 3905(6) | 2500    | 5196(2) | 29(1) |

**Table S2.** Bond lengths [Å] and angles [°] for H<sub>2</sub>-1,3-bdpp·MeOH.

|                |            |                  |            |
|----------------|------------|------------------|------------|
| O(1)-C(10)     | 1.416(3)   | C(2)-C(6)        | 1.473(2)   |
| N(1)-C(3)      | 1.337(2)   | C(2)-C(6)        | 1.473(2)   |
| N(1)-N(2)      | 1.360(2)   | C(3)-C(4)        | 1.494(2)   |
| N(2)-C(1)      | 1.339(2)   | C(6)-C(7)        | 1.3932(19) |
| C(1)-C(2)      | 1.400(2)   | C(6)-C(8)        | 1.402(2)   |
| C(1)-C(5)      | 1.498(2)   | C(7)-C(6)#1      | 1.3932(19) |
| C(2)-C(3)      | 1.403(2)   | C(8)-C(9)        | 1.384(2)   |
| C(8)-C(9)      | 1.384(2)   | C(9)-C(8)#1      | 1.384(2)   |
| C(3)-N(1)-N(2) | 108.99(15) | N(1)-C(3)-C(4)   | 120.41(15) |
| C(1)-N(2)-N(1) | 108.57(15) | C(2)-C(3)-C(4)   | 130.91(15) |
| N(2)-C(1)-C(2) | 108.89(15) | C(7)-C(6)-C(8)   | 118.18(15) |
| N(2)-C(1)-C(5) | 120.14(15) | C(7)-C(6)-C(2)   | 121.84(15) |
| C(2)-C(1)-C(5) | 130.92(15) | C(8)-C(6)-C(2)   | 119.98(14) |
| C(1)-C(2)-C(3) | 104.88(14) | C(6)#1-C(7)-C(6) | 122.1(2)   |
| C(1)-C(2)-C(6) | 127.52(15) | C(9)-C(8)-C(6)   | 120.55(16) |
| C(3)-C(2)-C(6) | 127.58(15) | C(8)-C(9)-C(8)#1 | 120.4(2)   |
| N(1)-C(3)-C(2) | 108.67(15) |                  |            |

Symmetry transformations used to generate equivalent atoms:

#1 x,-y+3/2,z

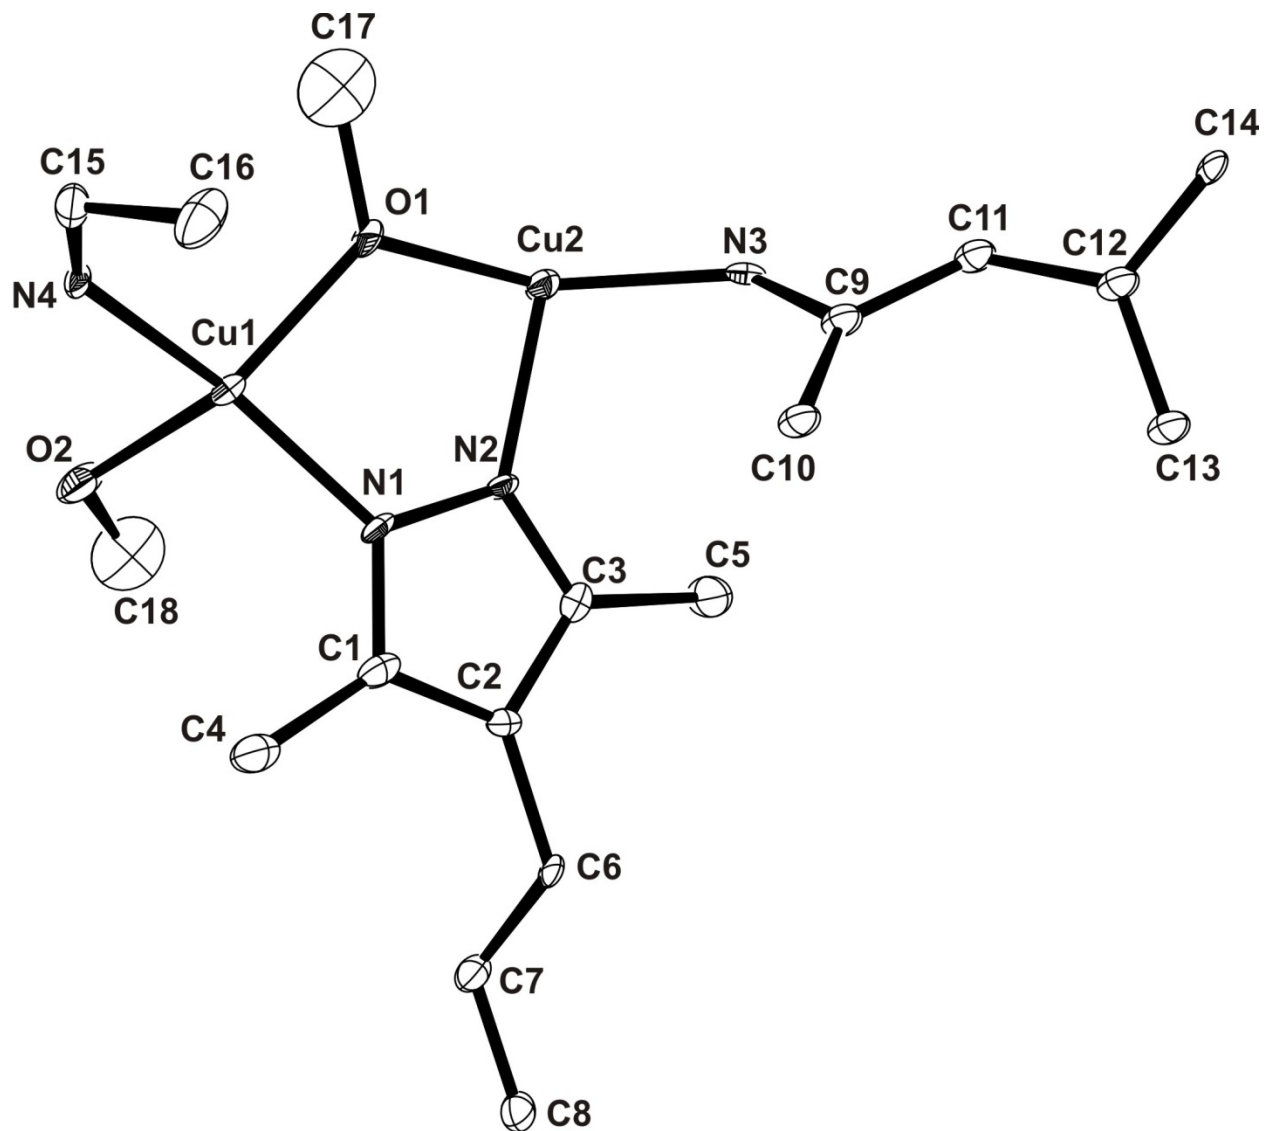

**Fig. S3.** Ortep-style plot of the asymmetric unit of CFA-5. Thermal ellipsoids probability: 50 %. Hydrogen atoms are omitted for clarity.

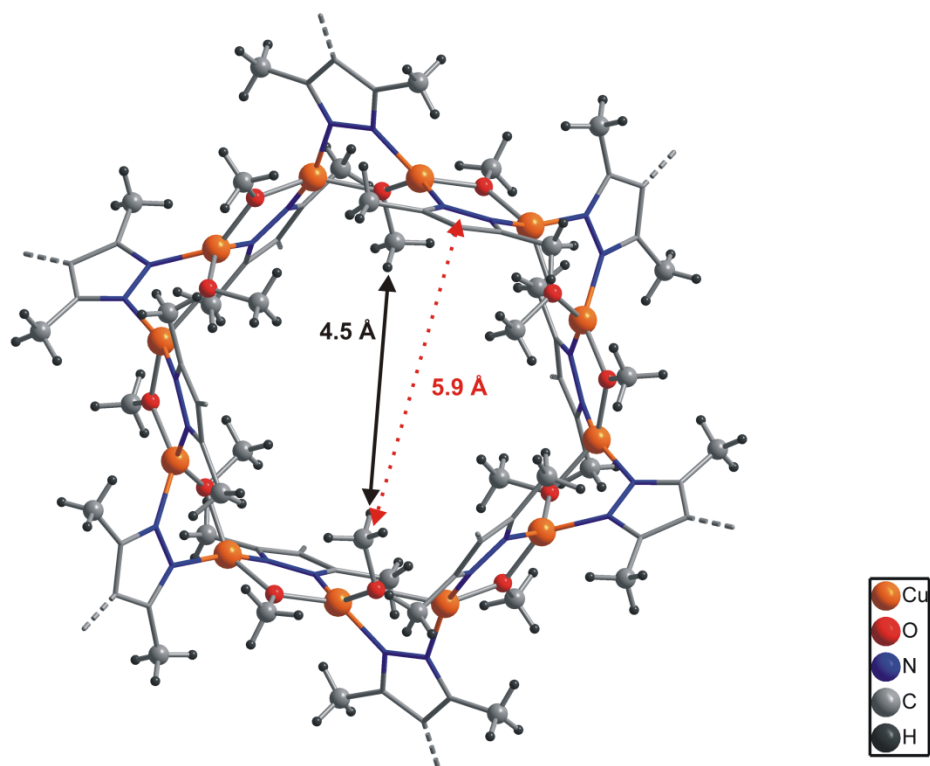

**Fig. S4.** Channel diameter in the CFA-5 structure.

**Table S3.** Atomic coordinates ( $\times 10^4$ ) and equivalent isotropic displacement parameters ( $\text{\AA}^2 \times 10^3$ ) for **CFA-5**.  $U(\text{eq})$  is defined as one third of the trace of the orthogonalized  $U^{\text{ij}}$  tensor.

|       | x       | y       | z        | U(eq) |
|-------|---------|---------|----------|-------|
| Cu(1) | 5251(1) | 6091(1) | 1177(1)  | 14(1) |
| Cu(2) | 5811(1) | 7490(1) | 1302(1)  | 13(1) |
| O(1)  | 5715(2) | 6796(2) | 1782(3)  | 18(1) |
| O(2)  | 4469(2) | 5473(2) | 1035(3)  | 22(1) |
| N(1)  | 5323(2) | 6525(2) | 172(3)   | 15(1) |
| N(2)  | 5485(2) | 7092(2) | 229(3)   | 11(1) |
| N(3)  | 6394(2) | 8259(2) | 962(3)   | 10(1) |
| N(4)  | 5380(2) | 5593(2) | 1908(3)  | 13(1) |
| C(1)  | 5187(3) | 6359(3) | -632(4)  | 18(2) |
| C(2)  | 5244(3) | 6816(3) | -1116(4) | 13(2) |
| C(3)  | 5432(3) | 7271(3) | -544(4)  | 16(2) |
| C(4)  | 5020(4) | 5760(3) | -910(5)  | 31(2) |
| C(5)  | 5538(3) | 7868(3) | -711(5)  | 26(2) |
| C(6)  | 5173(3) | 6828(3) | -2041(4) | 13(2) |
| C(7)  | 4655(3) | 6453(3) | -2452(4) | 15(2) |
| C(8)  | 4633(3) | 6460(3) | -3327(4) | 15(2) |
| C(9)  | 6847(3) | 8460(3) | 424(4)   | 13(1) |
| C(10) | 6932(3) | 8069(3) | -141(4)  | 13(1) |
| C(11) | 7201(3) | 9053(3) | 552(4)   | 13(1) |
| C(12) | 7714(3) | 9450(3) | 69(4)    | 13(1) |
| C(13) | 7688(3) | 9463(3) | -810(4)  | 13(1) |
| C(14) | 8233(3) | 9832(3) | 470(4)   | 10(1) |
| C(15) | 5853(3) | 5591(3) | 2141(4)  | 17(2) |
| C(16) | 6423(3) | 5978(3) | 1727(5)  | 25(2) |
| C(17) | 5926(5) | 6825(5) | 2626(6)  | 68(2) |
| C(18) | 4041(5) | 5640(5) | 680(7)   | 68(2) |



**Table S4.** Bond lengths [Å] and angles [°] for **CFA-5**.

---

|                   |           |                   |          |
|-------------------|-----------|-------------------|----------|
| Cu(1)-O(1)        | 1.923(4)  | C(1)-C(4)         | 1.502(9) |
| Cu(1)-N(4)        | 1.924(5)  | C(2)-C(3)         | 1.396(9) |
| Cu(1)-N(1)        | 1.925(5)  | C(2)-C(6)         | 1.480(9) |
| Cu(1)-O(2)        | 1.929(5)  | C(3)-C(5)         | 1.504(9) |
| Cu(2)-O(1)        | 1.904(4)  | C(6)-C(13)#3      | 1.388(9) |
| Cu(2)-O(2)#1      | 1.921(4)  | C(6)-C(7)         | 1.403(9) |
| Cu(2)-N(3)        | 1.942(5)  | C(7)-C(8)         | 1.387(9) |
| Cu(2)-N(2)        | 1.963(5)  | C(8)-C(14)#3      | 1.375(9) |
| O(1)-C(17)        | 1.439(11) | C(9)-C(11)        | 1.402(9) |
| O(2)-C(18)        | 1.531(11) | C(9)-C(10)        | 1.481(9) |
| O(2)-Cu(2)#2      | 1.921(4)  | C(11)-C(15)#1     | 1.396(9) |
| N(1)-C(1)         | 1.337(8)  | C(11)-C(12)       | 1.466(9) |
| N(1)-N(2)         | 1.359(7)  | C(12)-C(13)       | 1.394(9) |
| N(2)-C(3)         | 1.349(8)  | C(12)-C(14)       | 1.403(9) |
| N(3)-C(9)         | 1.355(8)  | C(13)-C(6)#3      | 1.388(9) |
| N(3)-N(4)#1       | 1.363(7)  | C(14)-C(8)#3      | 1.375(9) |
| N(4)-C(15)        | 1.326(8)  | C(15)-C(11)#2     | 1.396(9) |
| N(4)-N(3)#2       | 1.363(7)  | C(15)-C(16)       | 1.503(9) |
| C(1)-C(2)         | 1.386(9)  |                   |          |
|                   |           |                   |          |
| O(1)-Cu(1)-N(4)   | 97.5(2)   | N(3)#2-N(4)-Cu(1) | 117.6(4) |
| O(1)-Cu(1)-N(1)   | 97.5(2)   | N(1)-C(1)-C(2)    | 109.8(6) |
| O(1)-Cu(1)-O(2)   | 89.7(2)   | N(1)-C(1)-C(4)    | 121.4(6) |
| N(4)-Cu(1)-N(1)   | 156.9(2)  | C(2)-C(1)-C(4)    | 128.7(6) |
| O(1)-Cu(1)-O(2)   | 142.6(2)  | C(1)-C(2)-C(3)    | 104.3(6) |
| N(4)-Cu(1)-O(2)   | 88.3(2)   | C(1)-C(2)-C(6)    | 127.4(6) |
| N(1)-Cu(1)-O(2)   | 99.2(2)   | C(3)-C(2)-C(6)    | 128.0(6) |
| O(1)-Cu(2)-O(2)#1 | 98.2(2)   | N(2)-C(3)-C(2)    | 109.4(6) |
| O(1)-Cu(2)-N(3)   | 142.5(2)  | N(2)-C(3)-C(5)    | 122.8(6) |
| O(2)#1-Cu(2)-N(3) | 89.8(2)   | C(2)-C(3)-C(5)    | 127.7(6) |
| O(1)-Cu(2)-N(2)   | 90.5(2)   | C(13)#3-C(6)-C(7) | 118.8(6) |
| O(2)#1-Cu(2)-N(2) | 144.6(2)  | C(13)#3-C(6)-C(2) | 118.7(6) |
| N(3)-Cu(2)-N(2)   | 104.0(2)  | C(7)-C(6)-C(2)    | 122.4(6) |

|                    |          |                     |          |
|--------------------|----------|---------------------|----------|
| C(17)-O(1)-Cu(2)   | 117.5(5) | C(8)-C(7)-C(6)      | 119.2(6) |
| C(17)-O(1)-Cu(1)   | 124.0(5) | C(14)#3-C(8)-C(7)   | 121.8(6) |
| Cu(2)-O(1)-Cu(1)   | 117.9(2) | N(3)-C(9)-C(11)     | 109.0(6) |
| C(18)-O(2)-Cu(2)#2 | 109.9(5) | N(3)-C(9)-C(10)     | 121.5(6) |
| C(18)-O(2)-Cu(1)   | 116.4(5) | C(11)-C(9)-C(10)    | 129.4(6) |
| Cu(2)#2-O(2)-Cu(1) | 113.3(2) | C(15)#1-C(11)-C(9)  | 104.6(6) |
| C(1)-N(1)-N(2)     | 108.6(5) | C(15)#1-C(11)-C(12) | 127.9(6) |
| C(1)-N(1)-Cu(1)    | 131.0(5) | C(9)-C(11)-C(12)    | 127.3(6) |
| N(2)-N(1)-Cu(1)    | 120.1(4) | C(13)-C(12)-C(14)   | 118.5(6) |
| C(3)-N(2)-N(1)     | 107.8(5) | C(13)-C(12)-C(11)   | 119.9(6) |
| C(3)-N(2)-Cu(2)    | 133.6(4) | C(14)-C(12)-C(11)   | 121.5(6) |
| N(1)-N(2)-Cu(2)    | 118.2(4) | C(11)#2-C(15)-C(16) | 129.2(6) |
| C(9)-N(3)-N(4)#1   | 107.6(5) | C(6)#3-C(13)-C(12)  | 121.9(6) |
| C(9)-N(3)-Cu(2)    | 133.1(4) | C(8)#3-C(14)-C(12)  | 119.7(6) |
| N(4)#1-N(3)-Cu(2)  | 118.2(4) | N(4)-C(15)-C(11)#2  | 109.5(6) |
| C(15)-N(4)-N(3)#2  | 109.4(5) | N(4)-C(15)-C(16)    | 121.4(6) |
| C(15)-N(4)-Cu(1)   | 132.5(4) |                     |          |

---

Symmetry transformations used to generate equivalent atoms:

#1  $x-y+2/3, x+1/3, -z+1/3$ , #2  $y-1/3, -x+y+1/3, -z+1/3$ , #3  $-x+4/3, -y+5/3, -z-1/3$

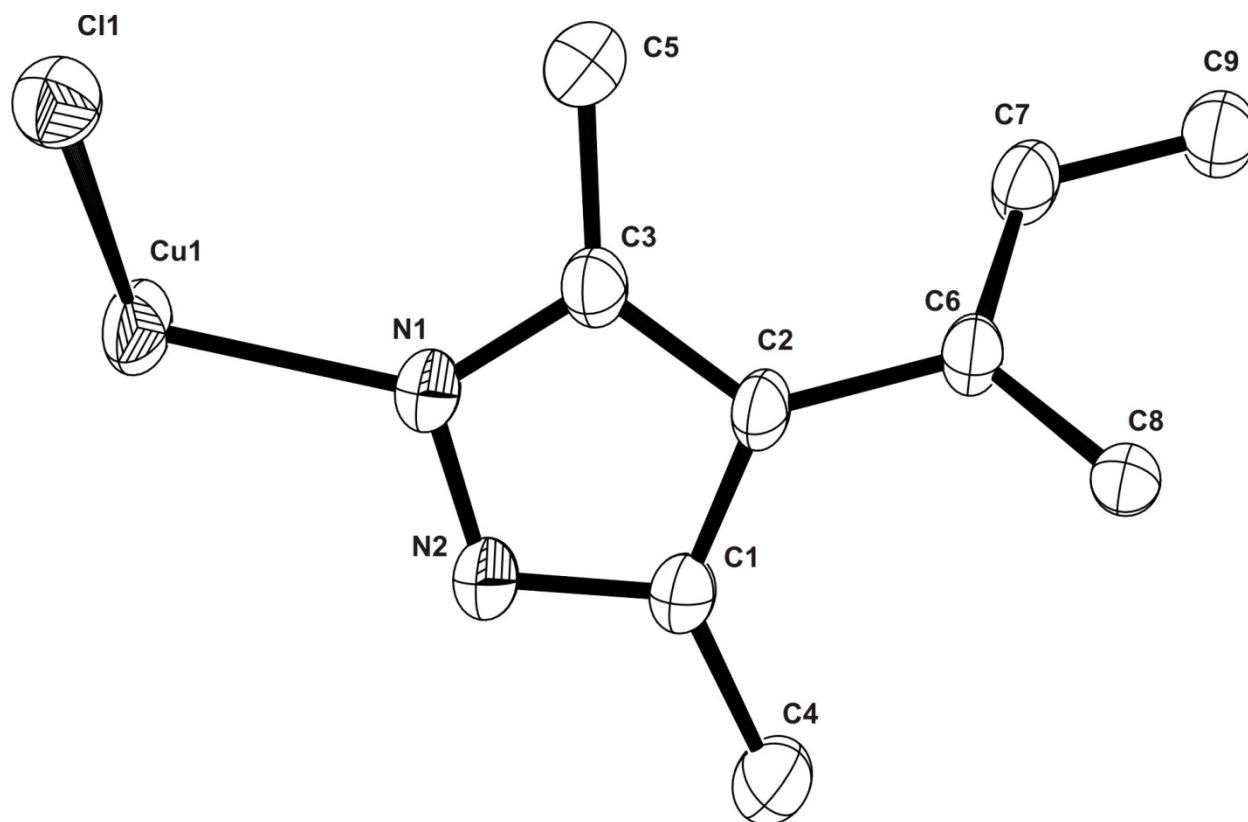

**Fig. S5.** Ortep-style plot of the asymmetric unit of  $[\text{CuCl}(\text{H}_2\text{-1,3-bdpb})]$ . Thermal ellipsoids probability: 50 %. Hydrogen atoms are omitted for clarity.

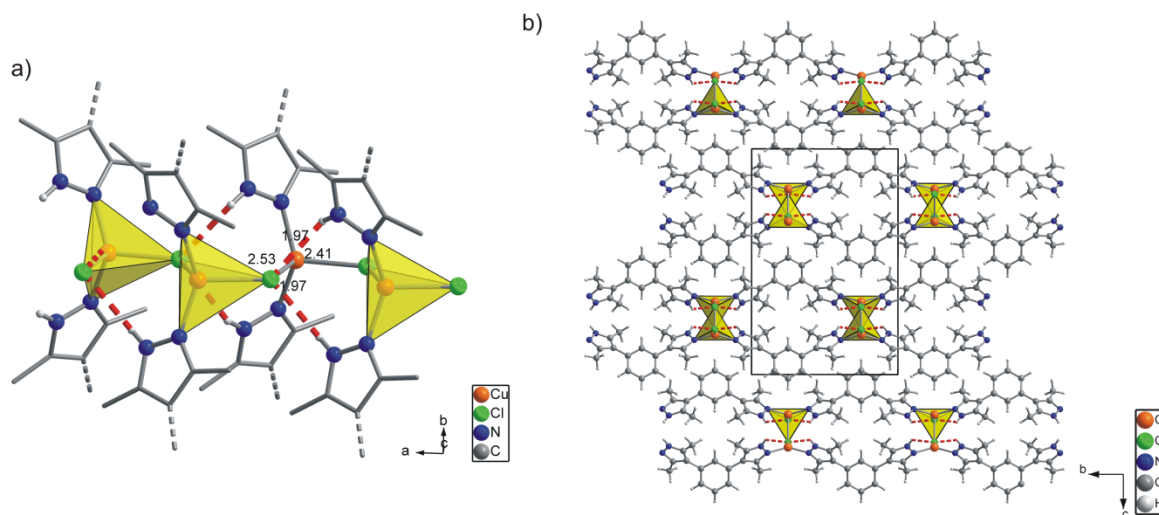

**Fig. S6** (a) Schematic representation of a selected part of the crystal structure of  $[\text{Cu}^{\text{I}}\text{Cl}(\text{H}_2\text{-1,3-bdpb})]$  showing the coordination of Cu(I) ions within zigzag chains expanding in  $[100]$  direction. Hydrogen bonds shown as intercepted red lines (b) Crystal packing diagram of  $[\text{Cu}^{\text{I}}\text{Cl}(\text{H}_2\text{-1,3-bdpb})]$ .

**Table S5.** Atomic coordinates ( $\times 10^4$ ) and equivalent isotropic displacement parameters ( $\text{\AA}^2 \times 10^3$ ) for  $[\text{CuCl}(\text{H}_2\text{-1,3-bdpp})]$ .  $U(\text{eq})$  is defined as one third of the trace of the orthogonalized  $U_{ij}$  tensor.

| Atom  | x        | y        | z       | $U(\text{eq})$ |
|-------|----------|----------|---------|----------------|
| Cu(1) | 6632(1)  | 12500    | 6778(1) | 35(1)          |
| Cl(1) | 10474(2) | 12500    | 6999(1) | 31(1)          |
| N(1)  | 5750(5)  | 11085(2) | 6528(2) | 31(1)          |
| C(1)  | 3707(6)  | 9660(3)  | 6617(2) | 31(1)          |
| N(2)  | 3993(5)  | 10645(2) | 6818(2) | 33(1)          |
| C(2)  | 5384(6)  | 9435(2)  | 6179(2) | 27(1)          |
| C(3)  | 6595(5)  | 10358(3) | 6140(2) | 27(1)          |
| C(4)  | 1825(7)  | 9044(3)  | 6867(2) | 47(1)          |
| C(5)  | 8557(6)  | 10598(3) | 5731(2) | 41(1)          |
| C(6)  | 5766(6)  | 8444(2)  | 5830(2) | 27(1)          |
| C(7)  | 6403(6)  | 8431(3)  | 5153(2) | 33(1)          |
| C(8)  | 5497(8)  | 7500     | 6157(2) | 27(1)          |
| C(9)  | 6730(9)  | 7500     | 4823(3) | 37(1)          |

**Table S6.** Bond lengths [ $\text{\AA}$ ] and angles [ $^\circ$ ] for  $[\text{Cu}^{\text{I}}\text{Cl}(\text{H}_2\text{-1,3-bdpp})]$ .

|                    |            |                |          |
|--------------------|------------|----------------|----------|
| Cu(1)-N(1)         | 1.969(3)   | C(1)-C(4)      | 1.493(5) |
| Cu(1)-N(1)#1       | 1.969(3)   | C(2)-C(3)      | 1.409(5) |
| Cu(1)-Cl(1)        | 2.4136(15) | C(2)-C(6)      | 1.474(4) |
| Cu(1)-Cl(1)#2      | 2.5340(14) | C(3)-C(5)      | 1.492(5) |
| Cl(1)-Cu(1)#3      | 2.5340(14) | C(6)-C(8)      | 1.391(4) |
| N(1)-C(3)          | 1.322(4)   | C(6)-C(7)      | 1.400(5) |
| N(1)-N(2)          | 1.353(4)   | C(7)-C(9)      | 1.385(4) |
| C(1)-N(2)          | 1.344(5)   | C(8)-C(6)#4    | 1.391(4) |
| C(1)-C(2)          | 1.384(5)   | C(9)-C(7)#4    | 1.385(4) |
|                    |            |                |          |
| N(1)-Cu(1)-N(1)#1  | 136.08(18) | C(1)-N(2)-N(1) | 112.1(3) |
| N(1)-Cu(1)-Cl(1)   | 108.54(9)  | C(1)-C(2)-C(3) | 104.8(3) |
| N(1)#1-Cu(1)-Cl(1) | 108.54(9)  | C(1)-C(2)-C(6) | 126.8(3) |
| N(1)-Cu(1)-Cl(1)#2 | 99.38(9)   | C(3)-C(2)-C(6) | 128.4(3) |

|                      |           |                  |          |
|----------------------|-----------|------------------|----------|
| N(1)#1-Cu(1)-Cl(1)#2 | 99.38(9)  | N(1)-C(3)-C(2)   | 110.9(3) |
| Cl(1)-Cu(1)-Cl(1)#2  | 95.93(4)  | N(1)-C(3)-C(5)   | 119.4(3) |
| Cu(1)-Cl(1)-Cu(1)#3  | 116.89(5) | C(2)-C(3)-C(5)   | 129.6(3) |
| C(3)-N(1)-N(2)       | 105.5(3)  | C(8)-C(6)-C(7)   | 118.2(3) |
| C(3)-N(1)-Cu(1)      | 134.1(3)  | C(8)-C(6)-C(2)   | 121.3(3) |
| N(2)-N(1)-Cu(1)      | 120.2(2)  | C(7)-C(6)-C(2)   | 120.5(3) |
| N(2)-C(1)-C(2)       | 106.7(3)  | C(9)-C(7)-C(6)   | 120.4(3) |
| N(2)-C(1)-C(4)       | 120.5(3)  | C(6)#4-C(8)-C(6) | 122.2(4) |
| C(2)-C(1)-C(4)       | 132.8(3)  | C(7)#4-C(9)-C(7) | 120.5(5) |

Symmetry transformations used to generate equivalent atoms:

#1  $x, -y+5/2, z$ ; #2  $x-1/2, -y+5/2, -z+3/2$ ; #3  $x+1/2, -y+5/2, -z+3/2$ ; #4  $x, -y+3/2, z$

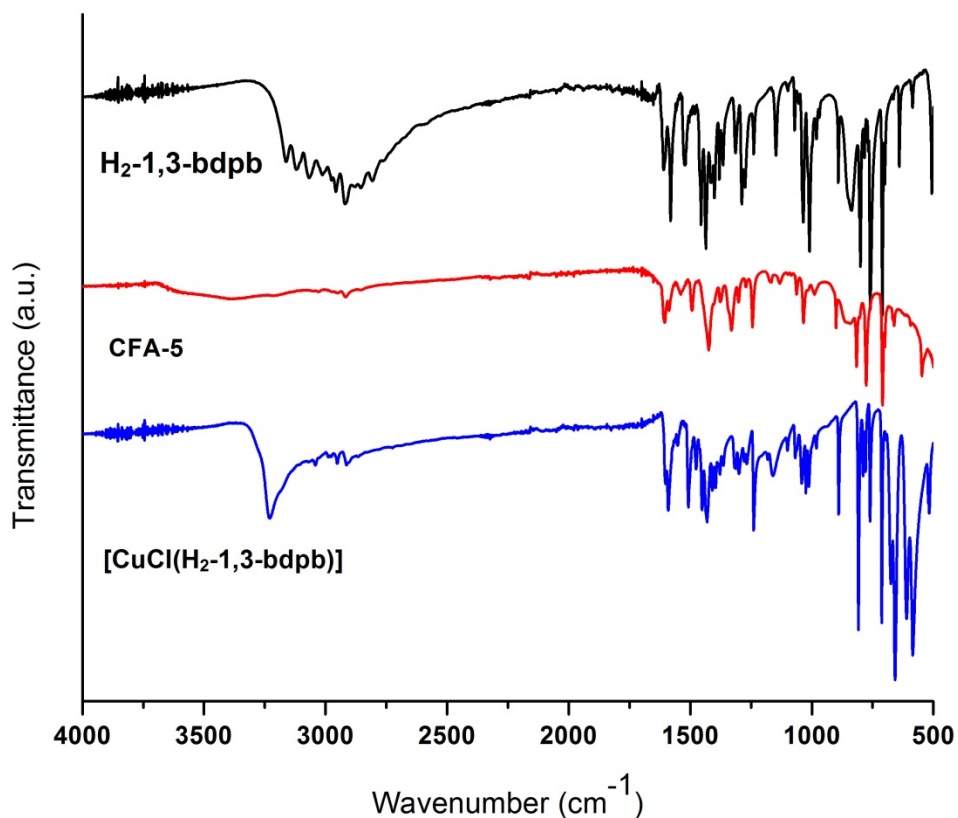

**Fig. S7.** IR spectra for H<sub>2</sub>-1,3-bdpb, CFA-5 and [CuCl(H<sub>2</sub>-1,3-bdpb)].

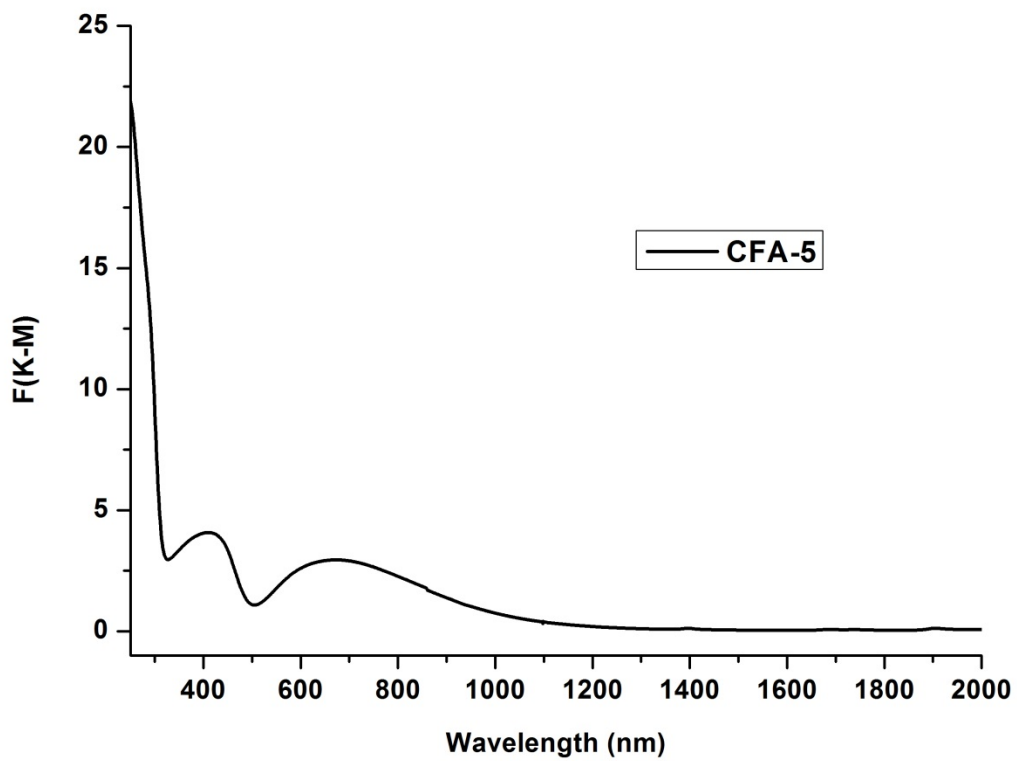

Fig. S8. UV/Vis spectrum of CFA-5.
